# Supplementary material for: Far beyond primary poly(vinylamine)s through free radical copolymerization and amide hydrolysis
Source: Royal Society of Chemistry journal article supplement (doi:10.1039/c5py01325a), 2015-10-06
Supplement: c5py01325a1.pdf [file c5py01325a1.pdf]

## Electronic Supporting Information

### Far Beyond Primary Poly(vinylamine)s Through Free Radical Copolymerization and Amides Hydrolysis

Mathilde Dréan,<sup>a,b</sup> Philippe Guégan,<sup>b</sup> Christine Jérôme,<sup>a</sup> Jutta Rieger,<sup>b\*</sup> Antoine Debuigne<sup>a\*</sup>

<sup>a</sup> Center for Education and Research on Macromolecules (CERM), Department of Chemistry, University of Liege (ULg), Sart-Tilman, Allée de la Chimie 3, Bat. B6a, B-4000 Liège, Belgium.

<sup>b</sup> Sorbonne Universités, UPMC Univ Paris 06, CNRS, Institut Parisien de Chimie Moléculaire, Equipe Chimie des Polymères, 4 Place Jussieu, F-75005 Paris, France.

**Table S1.** Radical copolymerizations for the determination of the reactivity ratios.

| Copolos                     | Feed Ratio <sup>a</sup> |                   |                  | Time (min) | Conv. (%) <sup>b</sup> | Copolymer composition <sup>c</sup> |                   |                  |
|-----------------------------|-------------------------|-------------------|------------------|------------|------------------------|------------------------------------|-------------------|------------------|
|                             | f <sub>NVA</sub>        | f <sub>NMVA</sub> | f <sub>VIm</sub> |            |                        | F <sub>NVA</sub>                   | F <sub>NMVA</sub> | F <sub>VIm</sub> |
| P(NVA- <i>stat</i> -NMVA)   | 0.68                    | 0.32              | /                | 30         | 13                     | 0.82                               | 0.18              | /                |
|                             | 0.62                    | 0.38              | /                | 25         | 11                     | 0.78                               | 0.22              | /                |
|                             | 0.51                    | 0.49              | /                | 25         | 15                     | 0.70                               | 0.30              | /                |
|                             | 0.41                    | 0.58              | /                | 30         | 18                     | 0.62                               | 0.38              | /                |
|                             | 0.30                    | 0.70              | /                | 30         | 10                     | 0.51                               | 0.48              | /                |
|                             | 0.20                    | 0.80              | /                | 30         | 14                     | 0.41                               | 0.59              | /                |
|                             | 0.11                    | 0.89              | /                | 30         | 10                     | 0.25                               | 0.85              | /                |
| P(NVA- <i>stat</i> -VIm)    | 0.72                    | /                 | 0.28             | 20         | 5                      | 0.60                               | /                 | 0.40             |
|                             | 0.49                    | /                 | 0.51             | 20         | 8                      | 0.42                               | /                 | 0.58             |
|                             | 0.40                    | /                 | 0.60             | 15         | 11                     | 0.38                               | /                 | 0.62             |
|                             | 0.28                    | /                 | 0.72             | 15         | 18                     | 0.28                               | /                 | 0.72             |
|                             | 0.25                    | /                 | 0.75             | 15         | 2                      | 0.25                               | /                 | 0.75             |
|                             | 0.16                    | /                 | 0.84             | 20         | 7                      | 0.15                               | /                 | 0.85             |
| P(NMVA- <i>stat</i> -1-VIm) | /                       | 0.80              | 0.20             | 60         | 6                      | /                                  | 0.50              | 0.50             |
|                             | /                       | 0.94              | 0.06             | 180        | 14                     | /                                  | 0.79              | 0.21             |
|                             | /                       | 0.97              | 0.03             | 120        | 9                      | /                                  | 0.86              | 0.14             |
|                             | /                       | 0.86              | 0.14             | 90         | 17                     | /                                  | 0.68              | 0.32             |
|                             | /                       | 0.72              | 0.28             | 60         | 5                      | /                                  | 0.49              | 0.50             |
|                             | /                       | 0.44              | 0.56             | 45         | 9                      | /                                  | 0.25              | 0.75             |
|                             | /                       | 0.41              | 0.59             | 45         | 8                      | /                                  | 0.26              | 0.74             |
|                             | /                       | 0.28              | 0.72             | 45         | 18                     | /                                  | 0.16              | 0.84             |
|                             | /                       | 0.18              | 0.82             | 30         | 7                      | /                                  | 0.68              | 0.32             |

Conditions: polymerization in a MeOD/DMSO mixture (DMSO/MeOD (v/v) = 0.05), 30°C, [comonomers]<sub>0</sub>/[V70]<sub>0</sub> = 50. <sup>a</sup> Determined by <sup>1</sup>H NMR of the initial feed mixture in MeOD. <sup>b</sup> Total monomer conversion determined by <sup>1</sup>H NMR in MeOD using DMSO as an internal standard. <sup>c</sup> Determined by <sup>1</sup>H NMR in MeOD after isolation of the copolymer.

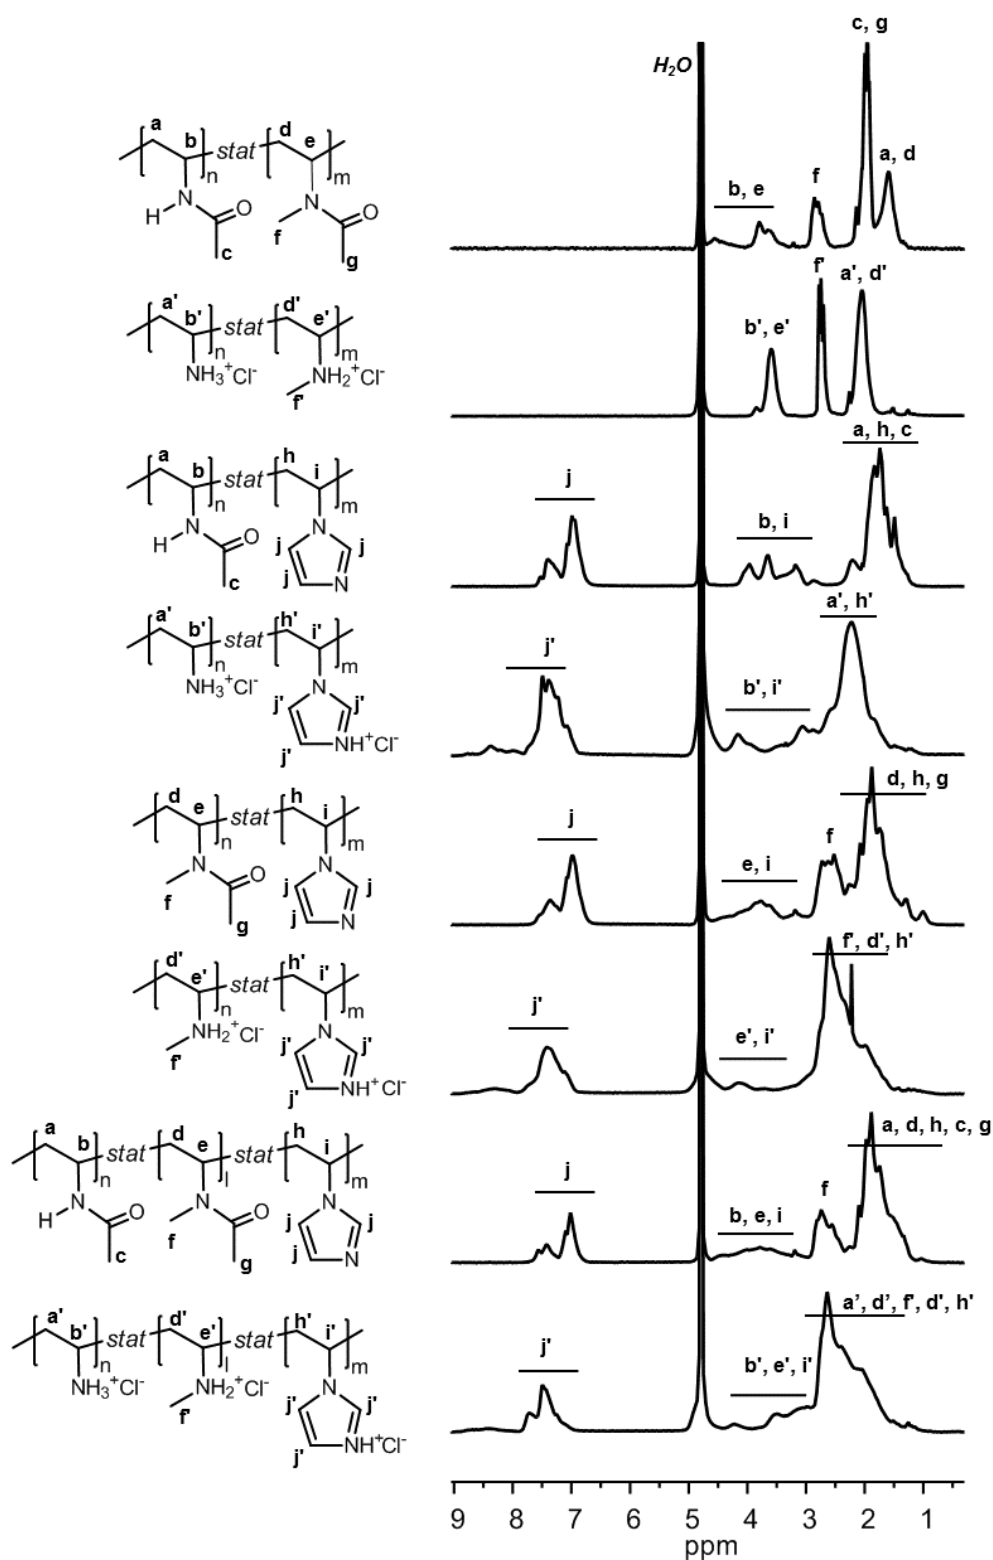

**Figure S1.** Overlay of the  $^1\text{H}$  NMR spectra of poly(*N*-vinylamides)-based copolymers before and after hydrolysis with HCl 6N. Spectra were recorded at 298K in D<sub>2</sub>O with a Bruker Avance (400 MHz) instrument.

**Table S2.** Determination of the reactivity ratios via the Extended Kelen-Tüdös (EKT)<sup>1</sup> method.

| Copolymers       | Feed Ratio <sup>a</sup> |                   |                  | Copolymer composition <sup>b</sup> |                   |                  | $\zeta_2$ | $\zeta_1$ | Z      | G'     | H'    | $\zeta$ | $\eta^c$ | Reactivity ratios      |                        |
|------------------|-------------------------|-------------------|------------------|------------------------------------|-------------------|------------------|-----------|-----------|--------|--------|-------|---------|----------|------------------------|------------------------|
|                  | f <sub>NVA</sub>        | f <sub>NMVA</sub> | f <sub>VIm</sub> | F <sub>NVA</sub>                   | F <sub>NMVA</sub> | F <sub>VIm</sub> |           |           |        |        |       |         |          |                        |                        |
| P(NVA-stat-NMVA) | 0.68                    | 0.32              | /                | 0.82                               | 0.18              | /                | 0.086     | 0.185     | 2.271  | 1.585  | 0.892 | 0.823   | 1.462    | $r_{NVA/NMVA} = 2.142$ |                        |
|                  | 0.62                    | 0.38              | /                | 0.78                               | 0.22              | /                | 0.090     | 0.193     | 2.275  | 1.116  | 0.684 | 0.781   | 1.274    |                        |                        |
|                  | 0.51                    | 0.49              | /                | 0.70                               | 0.30              | /                | 0.095     | 0.211     | 2.369  | 0.549  | 0.410 | 0.681   | 0.911    |                        |                        |
|                  | 0.41                    | 0.58              | /                | 0.62                               | 0.38              | /                | 0.100     | 0.233     | 2.501  | 0.248  | 0.259 | 0.574   | 0.549    |                        |                        |
|                  | 0.30                    | 0.70              | /                | 0.51                               | 0.48              | /                | 0.108     | 0.263     | 2.664  | 0.019  | 0.148 | 0.435   | 0.055    |                        | $r_{NMVA/NVA} = 0.316$ |
|                  | 0.20                    | 0.80              | /                | 0.41                               | 0.59              | /                | 0.116     | 0.305     | 2.962  | -0.107 | 0.078 | 0.289   | -0.395   |                        |                        |
|                  | 0.11                    | 0.89              | /                | 0.25                               | 0.85              | /                | 0.132     | 0.315     | 2.665  | -0.265 | 0.041 | 0.177   | -1.134   |                        |                        |
| P(NVA-stat-VIm)  | 0.77                    | /                 | 0.23             | 0.63                               | /                 | 0.37             | 0.307     | 0.164     | 0.486  | 1.521  | 7.355 | 0.862   | 0.178    | $r_{NVA/VIm} = 0.317$  |                        |
|                  | 0.72                    | /                 | 0.28             | 0.60                               | /                 | 0.40             | 0.284     | 0.165     | 0.541  | 0.984  | 5.243 | 0.817   | 0.153    |                        |                        |
|                  | 0.57                    | /                 | 0.43             | 0.47                               | /                 | 0.53             | 0.243     | 0.164     | 0.646  | -0.164 | 2.140 | 0.645   | -0.049   |                        |                        |
|                  | 0.49                    | /                 | 0.51             | 0.42                               | /                 | 0.58             | 0.205     | 0.192     | 0.932  | -0.408 | 0.713 | 0.377   | -0.215   |                        |                        |
|                  | 0.40                    | /                 | 0.60             | 0.38                               | /                 | 0.62             | 0.199     | 0.204     | 1.031  | -0.582 | 0.376 | 0.242   | -0.374   |                        | $r_{VIm/NVA} = 0.726$  |
|                  | 0.28                    | /                 | 0.72             | 0.28                               | /                 | 0.72             | 0.225     | 0.172     | 0.741  | -0.351 | 1.348 | 0.534   | -0.139   |                        |                        |
|                  | 0.25                    | /                 | 0.75             | 0.25                               | /                 | 0.75             | 0.2       | 0.199     | 0.990  | -0.673 | 0.340 | 0.224   | -0.444   |                        |                        |
| P(NMVA-stat-VIm) | 0.16                    | /                 | 0.84             | 0.15                               | /                 | 0.85             | 0.2       | 0.2       | 0.998  | -0.814 | 0.189 | 0.138   | -0.596   | $r_{NMVA/VIm} = 0.196$ |                        |
|                  | /                       | 0.86              | 0.14             | /                                  | 0.68              | 0.32             | 0.165     | 0.085     | 0.493  | -1.804 | 0.457 | 0.189   | -0.748   |                        |                        |
|                  | /                       | 0.72              | 0.28             | /                                  | 0.49              | 0.50             | 0.275     | 0.104     | 0.340  | -0.088 | 8.373 | 0.811   | -0.009   |                        |                        |
|                  | /                       | 0.60              | 0.40             | /                                  | 0.38              | 0.62             | 0.235     | 0.095     | 0.375  | -1.068 | 4.275 | 0.686   | -0.171   |                        |                        |
|                  | /                       | 0.44              | 0.56             | /                                  | 0.25              | 0.75             | 0.202     | 0.086     | 0.397  | -1.686 | 2.089 | 0.517   | -0.417   |                        |                        |
|                  | /                       | 0.41              | 0.59             | /                                  | 0.26              | 0.74             | 0.189     | 0.097     | 0.488  | -1.307 | 1.518 | 0.437   | -0.376   |                        | $r_{VIm/NMVA} = 1.845$ |
|                  | /                       | 0.28              | 0.72             | /                                  | 0.16              | 0.84             | 0.175     | 0.089     | 0.487  | -1.646 | 0.833 | 0.299   | -0.590   |                        |                        |
| /                | 0.18                    | 0.82              | /                | 0.68                               | 0.32              | 0.275            | 0.104     | 0.340     | -0.088 | 8.373  | 0.811 | -0.009  |          |                        |                        |

Conditions: polymerization in a MeOD/DMSO mixture (DMSO/MeOD (v/v) = 0.05), 30°C, [comonomers]<sub>0</sub>/[V70]<sub>0</sub> = 50. <sup>a</sup> Determined by <sup>1</sup>H NMR of the initial feed mixture in MeOD. <sup>b</sup> Determined by <sup>1</sup>H NMR in MeOD after isolation of the copolymer. <sup>c</sup> Extended Kelen Tüdös (EKT) equation :  $\eta = (r_1 + (r_2/\alpha)) \zeta - (r_2/\alpha)$ , where  $\eta = G'/(\alpha^2 + H')$ ;  $G' = (F-1)/Z$ ;  $H' = F/Z^2$ ;  $Z = [\log(1-\zeta_1)]/[\log(1-\zeta_2)]$ ;  $\zeta_1 = \zeta_2(F/f)$ ;  $\zeta_2 = w(\mu+f)/(\mu+F)$ ;  $\zeta = H'/(\alpha^2 + H')$ ;  $\alpha' = (H' \max H' \min)^{1/2}$ . The EKT involves parameters  $\eta$  and  $\zeta$ , mathematical functions of the ratio of molar composition in the monomer feed ( $f=f_1/f_2$ ) and in the copolymer ( $F=F_1/F_2$ ). The extended method uses new parameters such as  $w$  corresponding to the percentage of weight conversion (fixed at 15%) and  $\mu$  the ratio of the molecular weight of monomer 2 to monomer 1 ( $\mu=M_2/M_1$ ). <sup>1</sup> T. Kelen, F. Tüdös, B. Turcsányi and J. P. Kennedy, J. Polym. Sci. Polym. Chem. Ed., 1977, 15, 3047–3074.

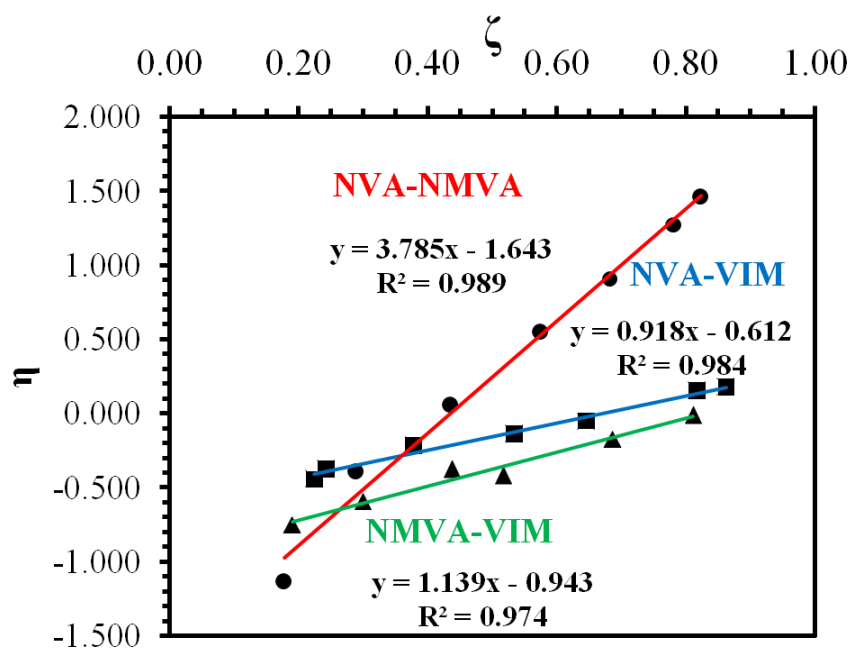

**Figure S2.** Extended Kelen-Tüdös plots for the copolymerization at 30 °C of N-vinylacetamide and N-methylvinylacetamide) (●), N-vinylacetamide and 1-vinylimidazole (■), N-methylvinylacetamide and 1-vinylimidazole) (▲).

**Table S3.** Determination of the hydrolysis level of the poly(*N*-vinylamide)-based copolymers by elementary analysis.

| Entry | Molar composition of the precursor <sup>a</sup> |                   |                  | Hydrolyzed copolymer |                 |                                 |                                                       | Hydrolysis level (%) |                   |
|-------|-------------------------------------------------|-------------------|------------------|----------------------|-----------------|---------------------------------|-------------------------------------------------------|----------------------|-------------------|
|       | F <sub>NVA</sub>                                | F <sub>NMVA</sub> | F <sub>VIM</sub> | %C <sup>c</sup>      | %N <sup>c</sup> | C/N <sub>exp</sub> <sup>c</sup> | C/N <sub>theor.</sub> <sup>b full</sup><br>hydrolysis | NVA <sup>d</sup>     | NMVA <sup>e</sup> |
|       |                                                 |                   |                  |                      |                 |                                 |                                                       |                      |                   |
| 1     | 1                                               | 0                 | 0                | 31.115               | 18.810          | 1.814                           | 1.716                                                 | 94 <sup>f</sup>      | /                 |
| 2     | 0                                               | 1                 | 0                | 38.945               | 13.410          | 2.904                           | 2.574                                                 | /                    | 81 <sup>g</sup>   |
| 3     | 0.68                                            | 0.32              | 0                | 35.260               | 16.645          | 2.118                           | 1.990                                                 | 94*                  | 90 <sup>h</sup>   |
| 4     | 0.52                                            | 0                 | 0.48             | 40.600               | 19.840          | 2.046                           | 1.994                                                 | 91 <sup>i</sup>      | /                 |
| 5     | 0                                               | 0.54              | 0.46             | 44.81                | 18.560          | 2.414                           | 2.303                                                 | /                    | 83 <sup>j</sup>   |
| 6     | 0.32                                            | 0.34              | 0.34             | 40.195               | 17.935          | 2.286                           | 2.151                                                 | 94*                  | 75 <sup>k</sup>   |

Hydrolysis conditions: HCl 6N /120 °C / 64 h. <sup>a</sup> Determined by <sup>1</sup>H NMR in D<sub>2</sub>O. <sup>b</sup> Determined by elementary analysis. <sup>c</sup> Calculated for full hydrolysis of the amides moieties. <sup>d</sup> NVA hydrolysis level = 100 x (1-*f*<sub>NVA residual</sub>) where *f*<sub>NVA residual</sub> is the molar fraction of the residual non-hydrolyzed NVA units. <sup>e</sup> NMVA hydrolysis level = 100 x (1-*f*<sub>NMVA residual</sub>) where *f*<sub>NMVA residual</sub> is the molar fraction of the residual non-hydrolyzed NMVA units. *f*<sub>NVA residual</sub> and *f*<sub>NMVA residual</sub> are determined based on formulas **f-k** (see below) established by taking into account the molar fraction of each comonomer in the copolymer precursor (F<sub>NVA</sub><sup>0</sup>, F<sub>NMVA</sub><sup>0</sup> and F<sub>VIM</sub><sup>0</sup>) and the respective numbers of carbon and nitrogen atoms in the hydrolyzed and non-hydrolyzed monomer units. MM<sub>C</sub> and MM<sub>N</sub> are the molar mass of C and N, respectively. In formulas h and k, *f*<sub>NVA residual</sub> is fixed at 0.06, in accordance with the hydrolysis level determined for the PNVA homopolymer, i.e. 94%.

$$f \quad f_{NVA \text{ residual}} = \frac{[MM_N \times \frac{C}{N}] - [2 \times MM_C]}{2 \times MM_C}$$

$$g \quad f_{NMVA \text{ residual}} = \frac{[MM_N \times \frac{C}{N}] - [3 \times MM_C]}{2 \times MM_C}$$

$$h \quad f_{NMVA \text{ residual}} = \frac{[MM_N \times \frac{C}{N}] - [3 \times MM_C \times F_{NMVA}^0] - [2 \times MM_C \times F_{NVA}^0 \times (f_{NVA \text{ residual}} + 1)]}{2 \times MM_C \times F_{NMVA}^0}$$

$$i \quad f_{NVA \text{ residual}} = \frac{[-MM_N \times \frac{C}{N} \times f_{NVA}^0] + [2 \times MM_N \times \frac{C}{N}] + [F_{NVA}^0 \times 3 \times MM_C] - [5 \times MM_C]}{2 \times MM_C \times F_{NVA}^0}$$

$$j \quad f_{NMVA \text{ residual}} = \frac{[2 \times MM_N \times \frac{C}{N}] - [MM_N \times \frac{C}{N}] + F_{NMVA}^0 - [5 \times MM_C] + [2 \times MM_C \times F_{NMVA}^0]}{2 \times MM_C \times F_{NMVA}^0}$$

k

$$f_{NMVA \text{ residual}} = \frac{[MM_N \times \frac{C}{N} \times (1 + F_{VIM}^0)] - [3 \times MM_C \times F_{NMVA}^0] - [2 \times MM_C \times F_{NVA}^0 \times (f_{NVA \text{ residual}} + 1)] - [5 \times MM_C \times F_{VIM}^0]}{2 \times MM_C \times F_{NMVA}^0}$$

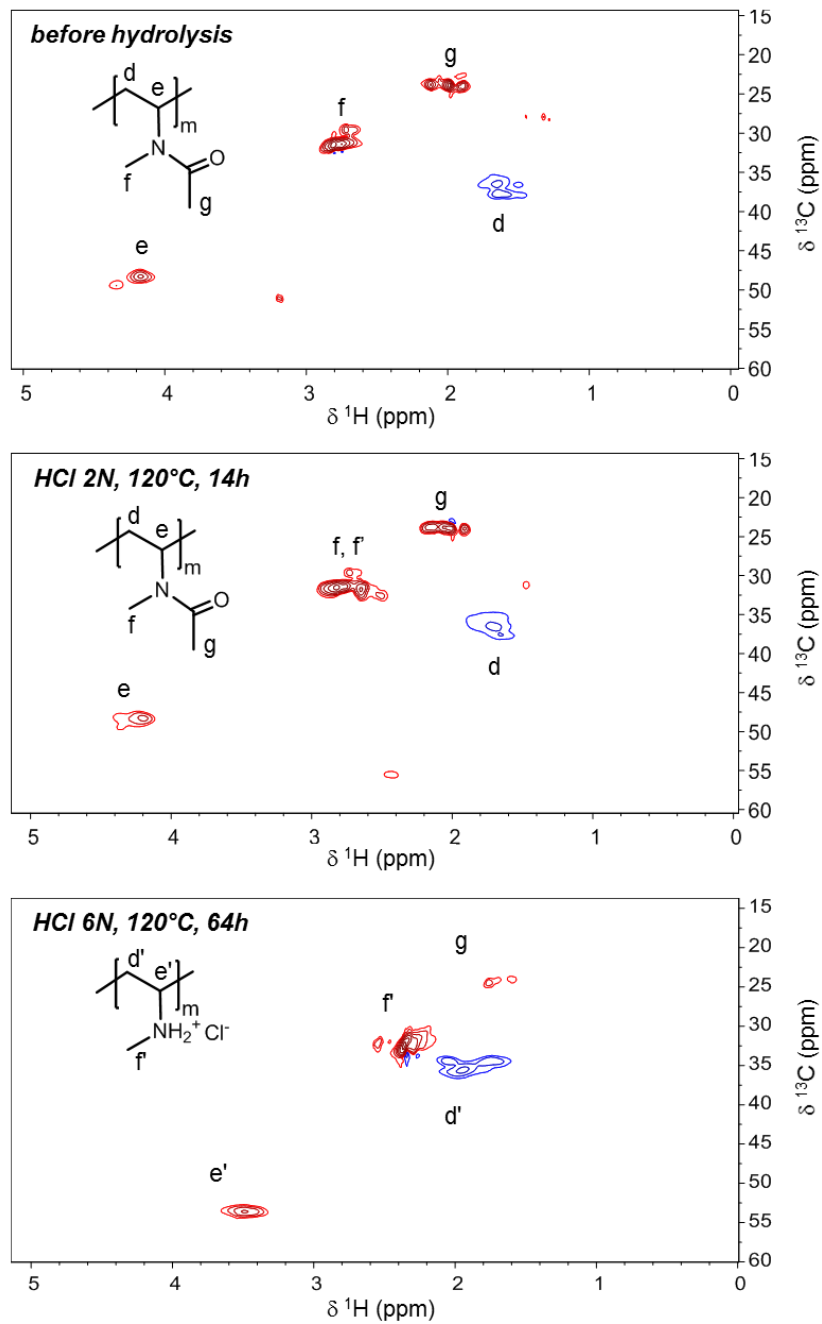

**Figure S3.**  $^1\text{H}$ - $^{13}\text{C}$  HSQC of PNMVA before and after acidic hydrolytic treatments. Spectra were recorded at 298K in  $\text{D}_2\text{O}$  with a Bruker Avance (500 MHz) instrument.

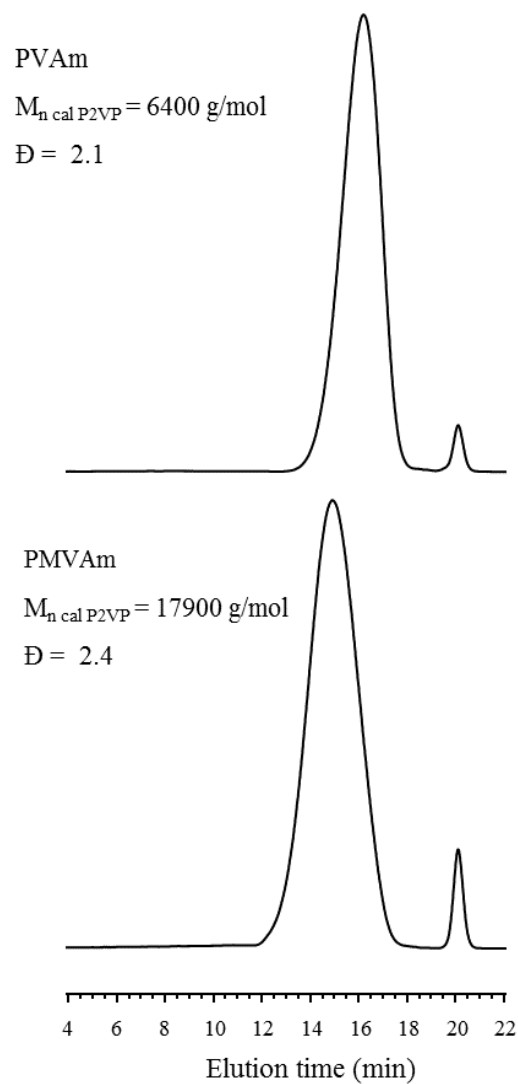

**Figure S4.** Aqueous size exclusion chromatograms of PVAm (upper curve) and PNMVAm (lower curve) produced by hydrolysis (HCl 6N, 120°C, 64h) of the parent PNVA and PNMVA samples, respectively. The small peak detected at higher elution time (20 minutes) corresponds to the injection peak.

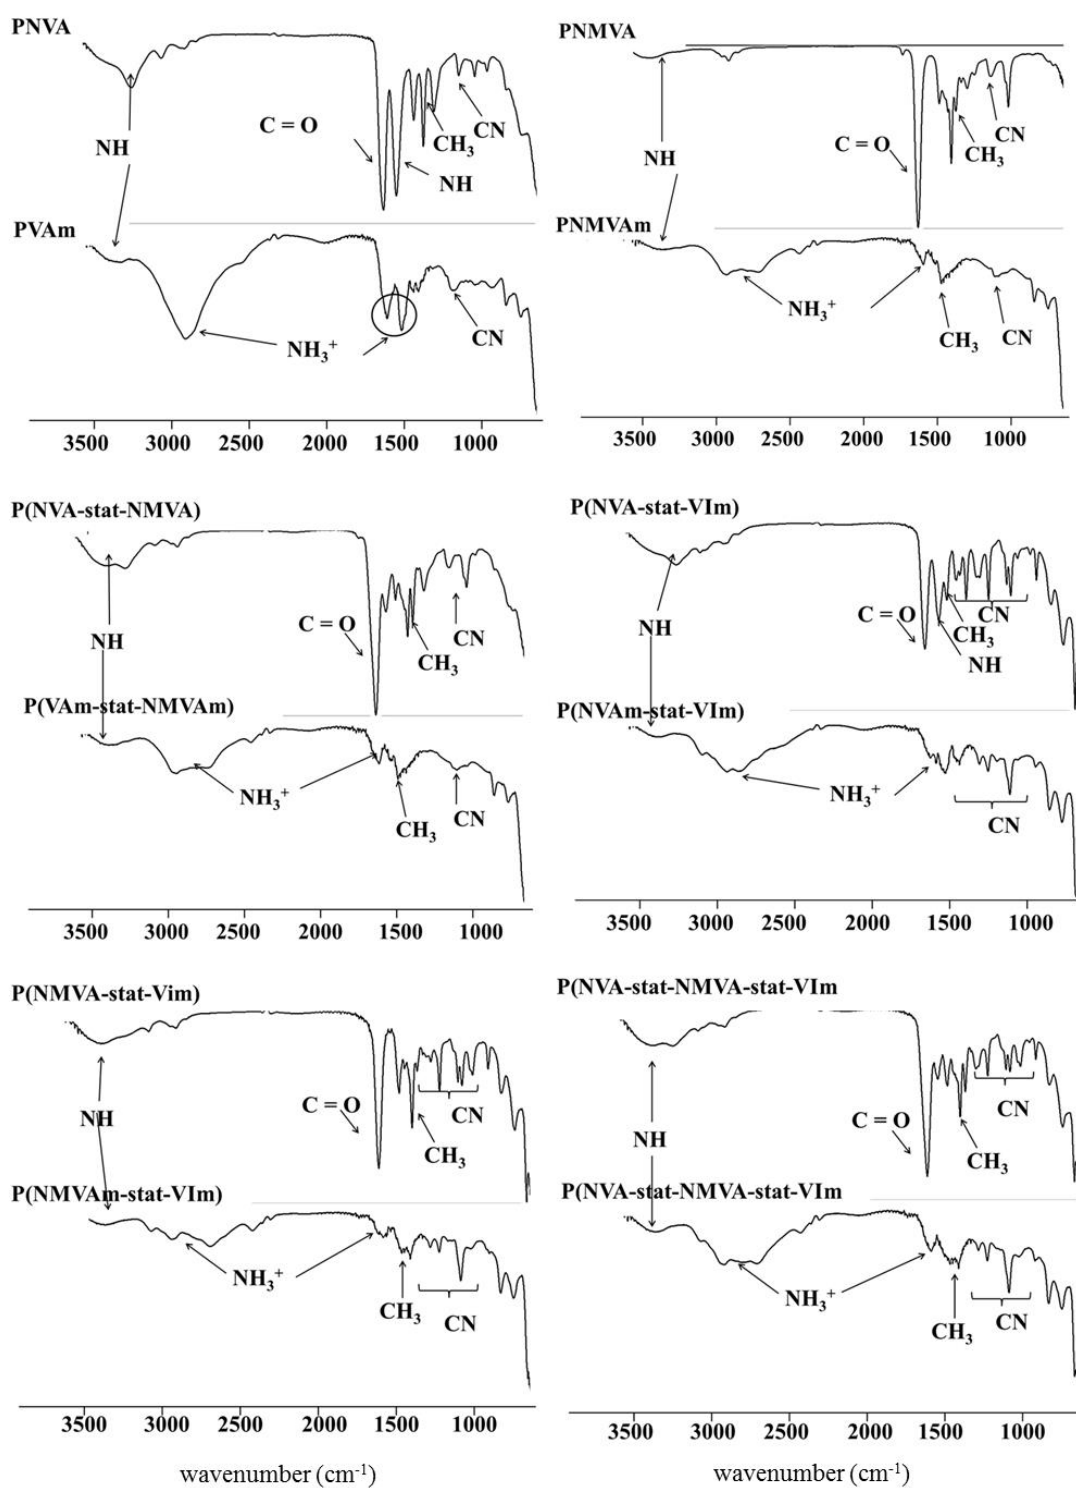

**Figure S5.** Overlay of the IR spectra of the copolymers before and after hydrolysis (HCl 6N, 120°C, 64h).
